# Supplementary material for: Quasi 10-day wave modulation of equatorial ionization anomaly during the Southern Hemisphere stratospheric warming of 2002
Source: Copernicus journal article supplement (doi:10.5194/angeo-2019-43), 2019-04-01
Supplement: Supplementary file [file angeo-2019-43-RC1-supplement.pdf]

In this work, the author has used the TEC data in the Southern Hemisphere (SH) to demonstrate the effects of quasi 10-day wave on the Northern and Southern TEC crests during the 2002 SH SSW event. The manuscript has been written well and is generally easy to understand. The results in this manuscript do provide a clear evidence of the quasi 10-day modulation of the TEC during the 2002 SSW event. I do have a few concerns and comments, which are mentioned below. However, in general, the manuscript provides some interesting new results and should be accepted after a revision.

### **Specific comments:**

Please plot a figure showing the location of the stations used in this work.

Line 97 - "To exclude these long period fluctuations in EIA region associated with solar/magnetosphere forcing, the periods longer than 15 days in the MLAT location and TEC of EIA crest are removed".

How is this process achieved? The author should clarify more regarding the applied method.

Line 152 - "Moreover, strong planetary wave scale quasi 10-day variation was observed in polar stratospheric temperature during this period".

Please cite the work in which this observation was mentioned.

### **Technical corrections:**

Figure 1 caption - Correct to solar flux

Line 92 - it consists of an eastward-propagating

Line 105 - too weak to be identified in F10.7

Line 107 - evolution

Line 108 - TEC of EIA crest and Kp,

Line 124, 125 - band-pass

Line 146 - have

Line 155 - series of studies have showed
